# Supplementary material for: Dynamic bandgap modulation in CsPbBr3 perovskite nanocrystals through reversible ammonia intercalation
Source: Royal Society of Chemistry journal article supplement (doi:10.1039/d4ra07759h), 2025-01-01
Supplement: d4ra07759h1.pdf [file d4ra07759h1.pdf]

## *Electronic Supporting Information:*

# **Dynamic Bandgap Modulation in CsPbBr<sub>3</sub> Perovskite Nanocrystals through Reversible Ammonia Intercalation**

Karayadi H. Fausia,<sup>a,b</sup> Bijoy Nharangatt,<sup>c</sup> Kavundath Muhsina,<sup>a</sup> John P. Rappai,<sup>a,d</sup> Raghu

Chatanathodi,<sup>c</sup> Deepthi Jose,<sup>e,\*</sup> Kulangara Sandeep<sup>a,\*</sup>

<sup>a</sup> Government Victoria College, Research Center under University of Calicut, Palakkad 678001,  
India.

<sup>b</sup> Department of Chemistry, MES Keveeyam College Valanchery, Kerala, 676552 India.

<sup>c</sup> Department of Physics, National Institute of Technology, Calicut, Kerala, 673601 India.

<sup>d</sup> Government Arts and Science College, Ollur, Kerala, India.

<sup>e</sup> Department of Chemistry, Providence Women's College, Calicut, 673009 India

\*E-mail: [deepthijose@providencecollegecalicut.ac.in](mailto:deepthijose@providencecollegecalicut.ac.in) (D.J.); [sandeepk@gvc.ac.in](mailto:sandeepk@gvc.ac.in) (K.S.)

---

| <b>Table of Contents</b>                                                     | <b>Page<br/>No.</b> |
|------------------------------------------------------------------------------|---------------------|
| 1 Materials and methods                                                      | <b>S3</b>           |
| 2 Emission quantum yield measurements                                        | <b>S3</b>           |
| 3 Estimation of grain size of CsPbBr <sub>3</sub> from XRD                   | <b>S4</b>           |
| 4 Calculation of the vapor pressure of ammonia solution                      | <b>S4</b>           |
| 5 Ammonia treatment: Reversibility of the substrates                         | <b>S5</b>           |
| 6 Characterization of CsPbBr <sub>3</sub> before and after ammonia treatment | <b>S5</b>           |
| 7 Octahedral tilting in ammonia treated samples                              | <b>S7</b>           |
| 8 PDOS plot                                                                  | <b>S7</b>           |

---

## 1. Materials and methods

**Chemicals:** Cesium carbonate ( $\text{Cs}_2\text{CO}_3$ , 99.99%), lead bromide ( $\text{PbBr}_2$ ), oleylamine (90%), and octadecene (98%) are purchased from Sigma-Aldrich. Oleic acid (98%) is obtained from Alfa-Aesar. Chloroform (Spectroscopic grade), acetone and 30% of ammonia solution are purchased from Merck chemicals. All chemicals and solvents are used without additional purification.

**Instrumental methods:** The electronic absorption spectra is recorded using a Shimadzu double beam spectrophotometer (Model UV-3600, UV-Vis-NIR), which is connected two sources (hydrogen – deuterium discharge tube and tungsten lamp) with three detectors (PMT, In GaAs, and PbS). Photoluminescence spectrum is recorded using JobinYvon SPEX- Fluorolog 3 from Horiba, where a 450 W Xenon arc lamp is used as the source for exciting samples. Also, in both the emission and excitation chambers, double monochromators are used. Side-on R928P photomultiplier tube (180-850 nm) is used to detect the emission spectrum. X-ray diffraction (XRD) analysis is carried out using a PANalytical X'Pert Pro diffractometer it has has a Ni-filtered  $\text{Cu-K}\alpha$  line with a wavelength of 0.1540598 nm ( $2\theta$  adjustable from  $10^\circ$  to  $50^\circ$  in  $0.02^\circ$  increments). For TEM, the sample is drop-casted onto a carbon-coated Cu grid and the solvent is allowed to evaporate. Specimens are imaged on an FEI TECNAI 30 G<sup>2</sup>HRTEM instrument. Software namely Gatan digital micrograph is used to obtain the d-spacing value in Z- direction.

## 2. Emission quantum yield measurements

Photoluminescence quantum yield of the  $\text{CsPbBr}_3$  perovskite nanocrystals are measured by following a relative method, in which fluorescein dye dissolved in 0.1 M NaOH ( $\Phi_{\text{ST}}$ : 0.9) is used as standard. The equation S1 is used for the estimation of photoluminescence quantum yield.

$$\Phi_x = \Phi_{\text{ST}} (f_x / f_{\text{ST}}) (a_{\text{ST}} / a_x) (n_x^2 / n_{\text{ST}}^2) \quad (\text{S1})$$

$f_x$  = Emission area of the sample

$f_{\text{ST}}$  = Emission area of the standard reference

$n_x$  = Refractive index of the solvent of the perovskite sample  
 $n_{ST}$  = Refractive index of the solvent of the reference standard  
 $a_{ST}$  = Absorbance of the reference standard at the excitation wavelength  
 $a_X$  = Absorbance of the sample at excitation wavelength  
 $\Phi_{ST}$  = Quantum yield of the standard.

### 3. Estimation of grain size of CsPbBr<sub>3</sub> from XRD

As per Debye-Scherrer equation, we have calculated the grain size of CsPbBr<sub>3</sub> perovskite nanocrystals.

$$L = \frac{0.9 \lambda}{\beta \cos \theta} \quad (\text{S2})$$

where L is the grain size of crystals,  $\beta$  denotes full width at half maximum (FWHM) in radians of the diffraction peaks,  $\theta$  is the Bragg's diffraction angle and  $\lambda$  is the wavelength for the K $\alpha$  component of the employed copper radiation (wavelength: 0.1540598 nm).

d-spacing calculation was done based on Bragg's equation.

$$n \lambda = 2d \sin \theta \quad (\text{S3})$$

n can be 0,1,2,-----,  $\theta$  is the Bragg's diffraction angle,  $\lambda$  is the wavelength for the K $\alpha$  component of the employed copper radiation (wavelength: 0.1540598 nm) and d is the interplanar distance.

Calculation of vapour pressure of ammonia solution

### 4. Calculation of the vapor pressure of ammonia solution

According to Raoult's law equation, we have calculated 30% of vapor pressure of ammonia solution (commercially).

$$P_a = P^{\circ}_a X_a \quad (\text{S4})$$

Where  $P^{\circ}_a$  at 30° C for pure ammonia is 1166 kPa.

### 5. Ammonia treatment: Reversibility of the substrates

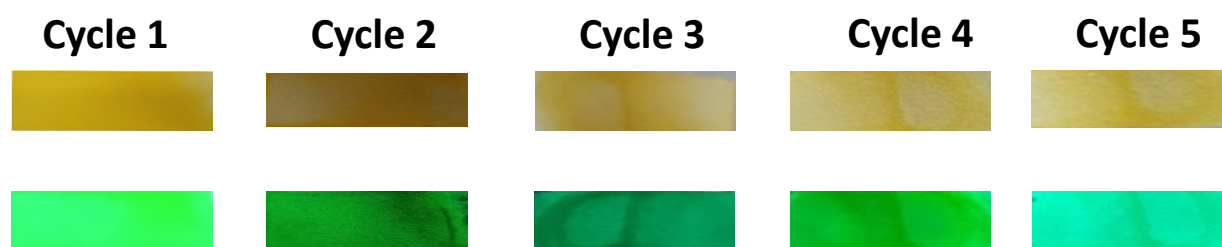

Fig. S1: Paper substrate viewed under visible and UV (356 nm) light under each cycle.

### 6. Characterization of CsPbBr<sub>3</sub> before and after ammonia treatment

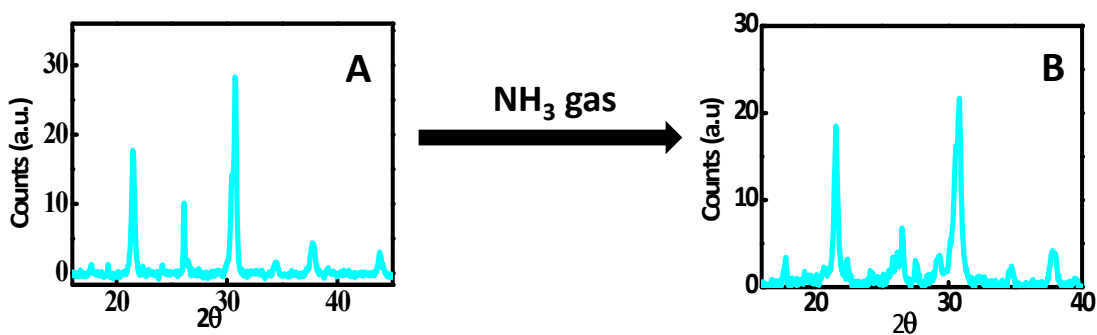

Fig. S2: XRD patterns of CsPbBr<sub>3</sub> perovskite nanocrystals before (A) and after (B) gaseous ammonia exposure.

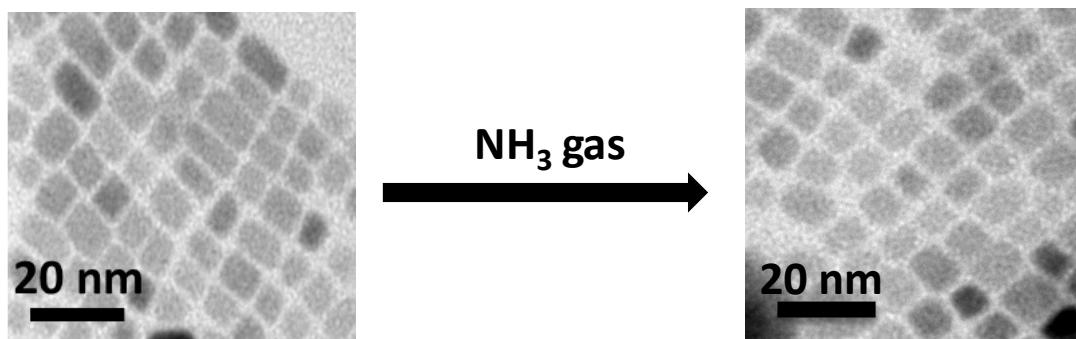

**Fig. S3:** TEM images of CsPbBr<sub>3</sub> perovskite nanocrystals before (A) and after (B) gaseous ammonia exposure.

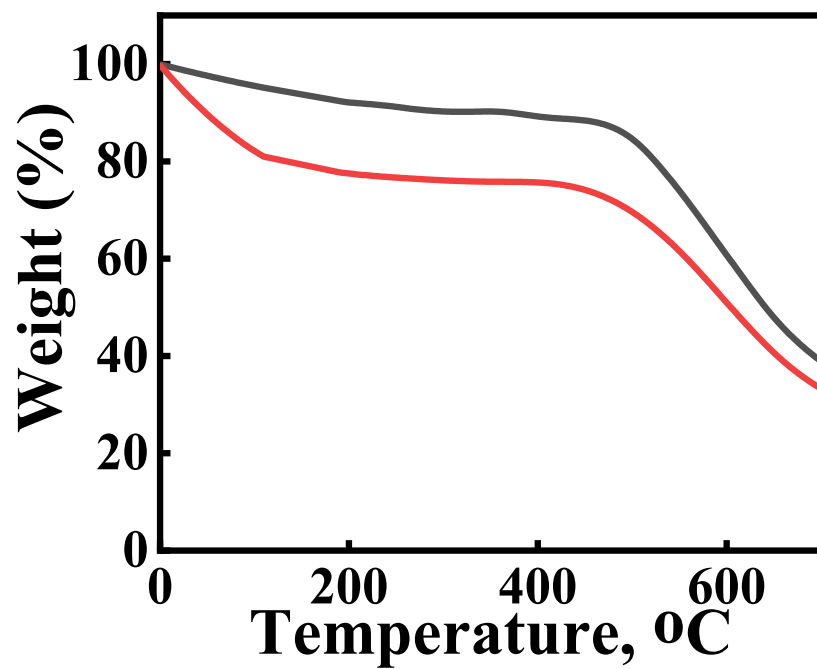

**Fig. S4:** TGA analysis of CsPbBr<sub>3</sub> perovskite nanocrystals before (black trace) and after (red trace) gaseous ammonia exposure.

## 7. Octahedral tilting in ammonia treated samples

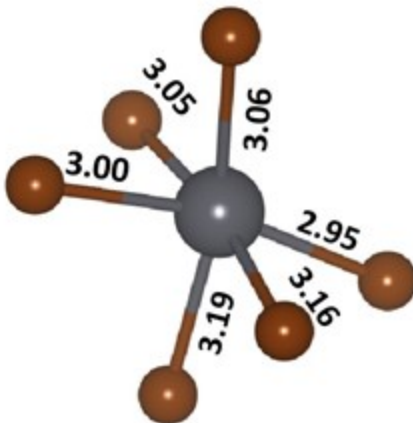

**Fig. S5:** Variations in Pb-Br Bond length of CsPbBr<sub>3</sub> after NH<sub>3</sub> intercalation.

### 8. PDOS Plot

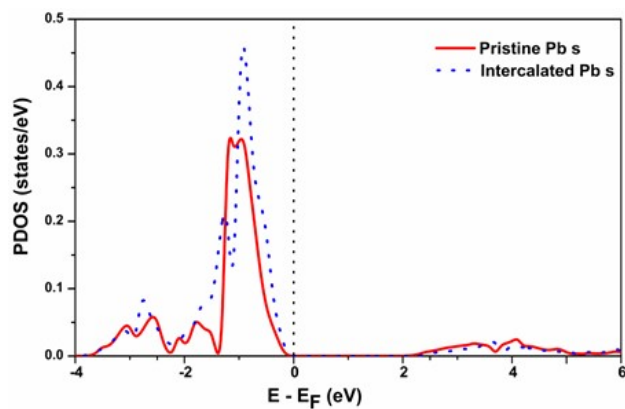

**Fig. S6:** The PDOS plot for the s orbital Pb atoms of before and after the intercalation of NH<sub>3</sub>.
